# Supplementary material for: The hydrophobic effect characterises the thermodynamic signature of amyloid fibril growth
Source: PubMed Central journal article supplement (PMC7282669; doi:10.1371/journal.pcbi.1007767), 2020-05-04
Supplement: pcbi.1007767.s001.pdf [file pcbi.1007767.s001.pdf]

## Simulation methods

### Definition of states

We observe four distinct states, which for the analysis are defined based on the number of external contacts for the two free peptides; external contacts ( $C_{ext}$ ) are here defined as the interchain contacts between either the free peptides or the free peptides and the seed. Note that there are a further 70 external contacts present in the seed fibril that cannot be changed during the simulations.

The monomeric, fibrillar and amorphous states are then defined as:

$$monomer = \begin{cases} 1 & \text{if } C_{ext} = 0 \\ 0 & \text{otherwise} \end{cases}$$

$$amorphous = \begin{cases} 1 & \text{if } 11 < C_{ext} \leq 14 \\ 0 & \text{otherwise} \end{cases}$$

$$fibril = \begin{cases} 1 & \text{if } C_{ext} \geq 16 \\ 0 & \text{otherwise} \end{cases}$$

$$fully\ aggregated = \begin{cases} 1 & \text{if } C_{ext} = 21 \\ 0 & \text{otherwise} \end{cases}$$

### Enthalpy sampling

For the simulation we calculate the enthalpy difference between the ensemble of the fully aggregated state (A:  $C_{ext} = 21$ ) and the monomeric state (M:  $C_{ext} = 0$ ); in the latter case only the seed peptides still make contacts. The enthalpy difference  $\Delta E$  is then calculated as  $\Delta E = \langle E \rangle_A - \langle E \rangle_M$ .

### Hydrogen bonds

The term describing hydrogen bonds can be written as  $E_{hb} = \sum \epsilon_{hb} H_{i,j} \cdot C_{i,j}$ , where  $\epsilon_{hb}$  represents the potential energy per hydrogen bond.  $H_{i,j} = 1$  indicates that a hydrogen bond is present, and  $H_{i,j} = 0$  indicates that no hydrogen bond is present. In our model, the water interactions are implicit, so  $\epsilon_{hb}$  indicates the difference between a hydrogen bond of an amino acid with the solvent and a hydrogen bond in bulk water. Hydrogen bonds between amino acids and the solvent are typically stronger than the hydrogen bonds in a bulk solvent. We investigate the cases  $\epsilon_{hb} \in \{0.25, 0.5, 0.75, 1.0\}$  with  $\epsilon_{hb} = 0.5$  as default.

### Entropically favourable $\beta$ -sheets

We also investigated the effect of an entropic bonus for  $\beta$ -sheets. The high stability of  $\beta$ -sheets at elevated temperatures suggests that  $\beta$ -sheets may have a higher entropy than other secondary structure elements. Moreover, amino acids with a high propensity for  $\beta$ -strand formation tend to be  $\beta$ -branched [1], suggesting that the  $\beta$ -strand states will be entropically more favourable. Core regions of amyloid forming proteins tend to have a high  $\beta$ -strand forming propensity [2], to model this propensity we allow an entropic term,  $N_\beta$ , to be set for the  $\beta$ -strand state modelling degeneracy of the state.

This allows us to investigate the effect of a local entropic ‘bonus’ a residue receives for being in a  $\beta$ -sheet. Unless otherwise stated  $N_\beta = 1$ , giving no bias.

## Sampling analysis

We used the umbrella sampling method to sample the conformational space [3]. As order parameter, we used the number of external contacts,  $C_{\text{ext}}$ . We use a quadratic biasing potential to define  $E_{\text{umbr}}$ :

$$E_{\text{umbr}} = \mathcal{H} + k(C_{\text{ext}} - C_{\text{ext},0})^2$$

Where  $k$  is the spring constant,  $\mathcal{H}$  the Hamiltonian defined in eqn. 10 (see Materials and Methods), and  $C_{\text{ext},0}$  the value towards which the simulation is biased. In our simulations,  $k = 2$  and  $C_{\text{ext},0} \in \{0,5,10,15,20,25\}$ .

## References

1. Chou KC, Némethy G, Scheraga HA. Role of interchain interactions in the stabilization of the right-handed twist of  $\beta$ -sheets. *Journal of molecular biology*. 1983;168(2):389–407
2. Trovato A, Chiti F, Maritan A, Seno F. Insight into the structure of amyloid fibrils from the analysis of globular proteins. *PLoS computational biology*. 2006;2(12):e170
3. Grossfield A. WHAM: the weighted histogram analysis method; 2003
